# Supplementary material
Source: MDPI journal article supplement (https://www.mdpi.com/2072-4292/14/22/5726)
Supplement: s1 [file s1]

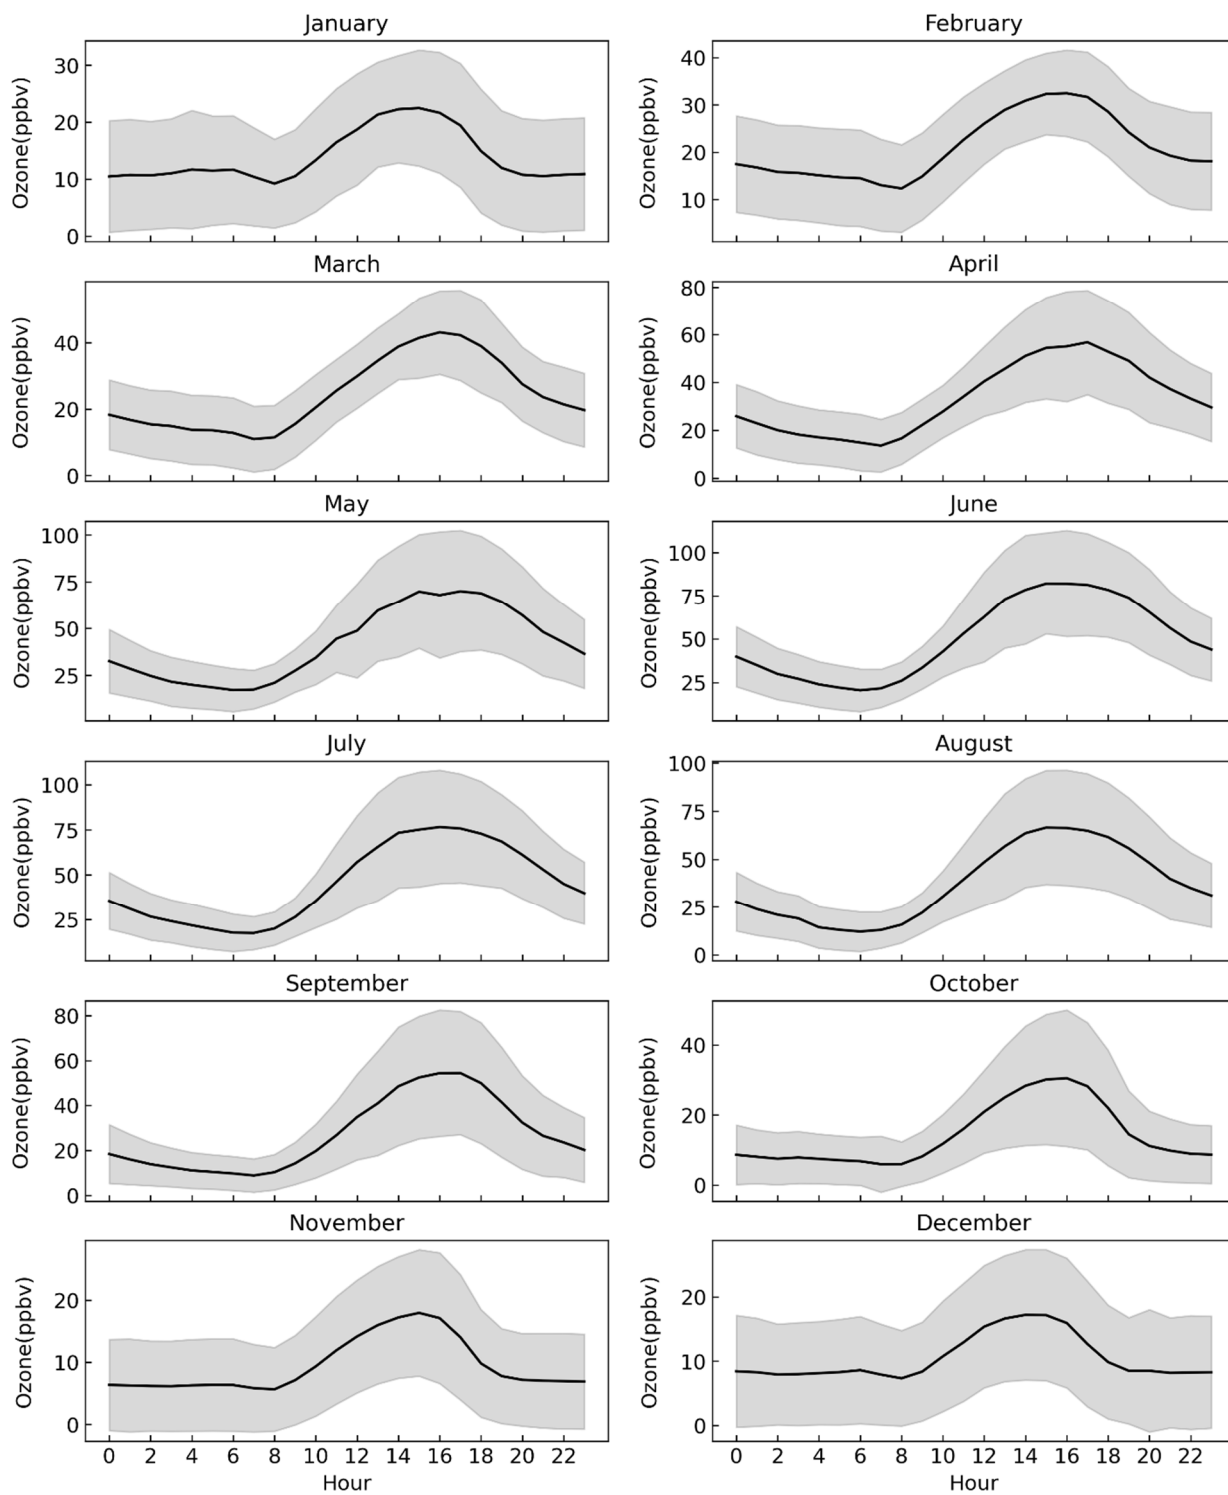

**Figure S1.** The diurnal cycle of Beijing ozone measured by MEE in 12 months for 2014-2020. The dark grey shaded area shows its standard deviation.

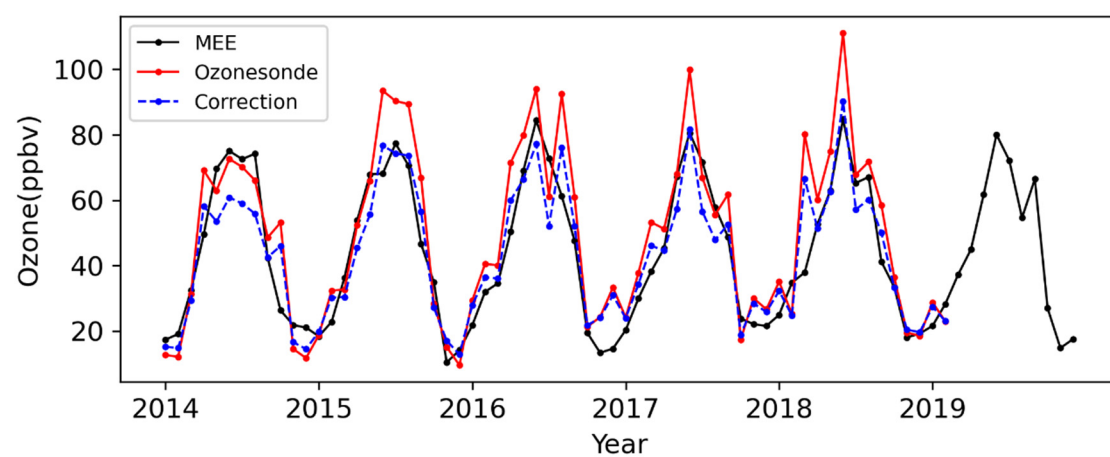

**Figure S2.** The ozonesonde (solid red curve) and MEE (solid black curve) ozone data for 2014-2019 and new ozonesonde data (dotted blue curve) corrected by linear regression based on MEE data.

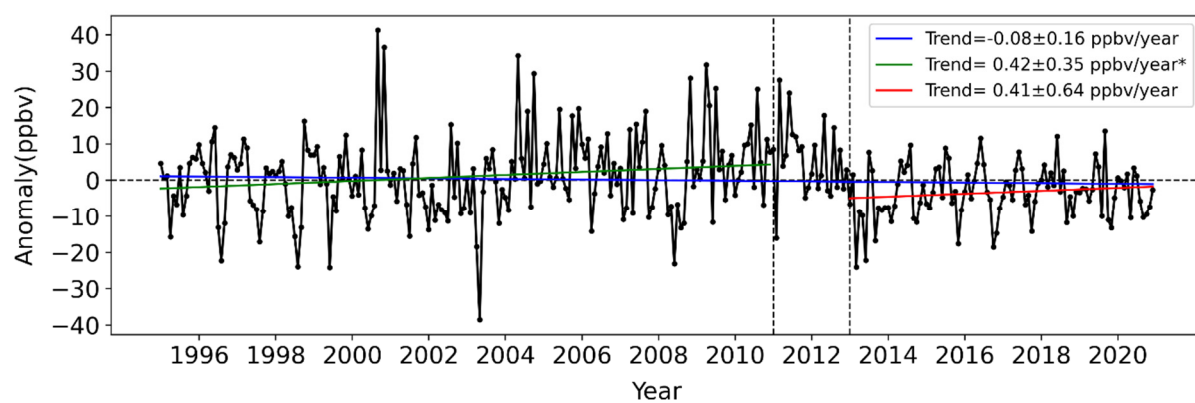

**Figure S3.** Monthly mean surface ozone anomalies calculated by subtracting average of each month and its linear trends during 1995-2020 (solid blue line), before 2011 (solid green line) and after 2013 (solid red line). The trends with "\*" passed the 95 % significance test.

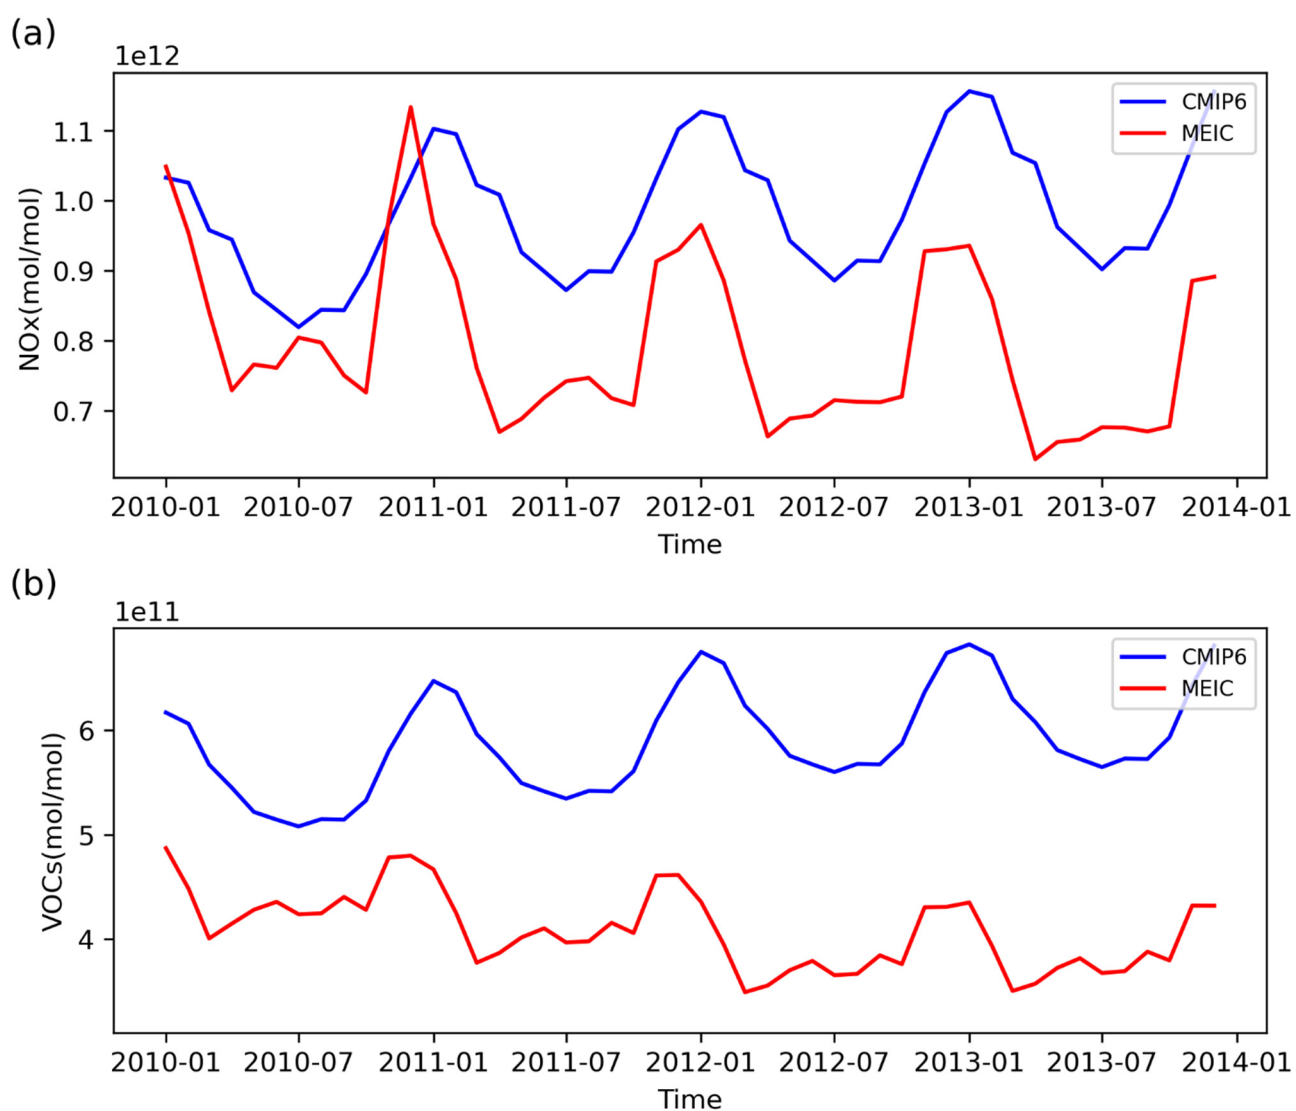

**Figure S4.** Anthropogenic emission of NO<sub>x</sub> (a) and VOCs (b) in Beijing from CMIP6 (blue line) and MEIC (red line).
